# Supplementary material for: A Comparative Peptidomic Characterization of Cultured Skeletal Muscle Tissues Derived From db/db Mice
Source: Front Endocrinol (Lausanne). 2019 Oct 29;10:741. doi: 10.3389/fendo.2019.00741 (PMC6828820; doi:10.3389/fendo.2019.00741)
Supplement: Table S4 — The matching results of the precursor proteins from STRING database. [file Table_4.XLSX]

## Sheet: Table S4
Table S4. The matching results of the precursor proteins from STRING database.
query sequence	STRING protein	annotation	identity	bitscore
sp|A2ASS6|TITIN_MOUSE	Ttn	Titin; Key component in the assembly and functioning of vertebrate striated muscles. By providing connections at the level of individual microfilaments, it contributes to the fine balance of forces between the two halves of the sarcomere. The size and extensibility of the cross-links are the main determinants of sarcomere extensibility properties of muscle. In non-muscle cells, seems to play a ro…	1.1	63104.5
sp|P05064|ALDOA_MOUSE	Aldoa	Fructose-bisphosphate aldolase A; Plays a key role in glycolysis and gluconeogenesis. In addition, may also function as scaffolding protein (By similarity); Belongs to the class I fructose-bisphosphate aldolase family	1	734.2
sp|P05977|MYL1_MOUSE	Myl1	Myosin light chain 1/3, skeletal muscle isoform; Regulatory light chain of myosin. Does not bind calcium	1.13	323.2
sp|P07310|KCRM_MOUSE	Ckm	Creatine kinase M-type; Reversibly catalyzes the transfer of phosphate between ATP and various phosphogens (e.g. creatine phosphate). Creatine kinase isoenzymes play a central role in energy transduction in tissues with large, fluctuating energy demands, such as skeletal muscle, heart, brain and spermatozoa; Belongs to the ATP:guanido phosphotransferase family	1	790.4
sp|P09411|PGK1_MOUSE	Pgk1-rs7	Phosphoglycerate kinase 1; In addition to its role as a glycolytic enzyme, it seems that PGK-1 acts as a polymerase alpha cofactor protein (primer recognition protein). May play a role in sperm motility; Belongs to the phosphoglycerate kinase family	1	832
sp|P09542|MYL3_MOUSE	Myl3	Myosin light chain 3; Regulatory light chain of myosin. Does not bind calcium	1.19	334.7
sp|P16015|CAH3_MOUSE	Car3	Carbonic anhydrase 3; Reversible hydration of carbon dioxide	1	567.8
sp|P16858|G3P_MOUSE	Gapdh	Glyceraldehyde-3-phosphate dehydrogenase; Has both glyceraldehyde-3-phosphate dehydrogenase and nitrosylase activities, thereby playing a role in glycolysis and nuclear functions, respectively. Glyceraldehyde-3-phosphate dehydrogenase is a key enzyme in glycolysis that catalyzes the first step of the pathway by converting D-glyceraldehyde 3- phosphate (G3P) into 3-phospho-D-glyceroyl phosphate. M…	1	671.4
sp|P17751|TPIS_MOUSE	Tpi1	Triosephosphate isomerase 1; Belongs to the triosephosphate isomerase family	1	615.5
sp|P21550|ENOB_MOUSE	Eno3	Beta-enolase; Appears to have a function in striated muscle development and regeneration	1	869
sp|P63028|TCTP_MOUSE	Tpt1	Translationally-controlled tumor protein; Involved in calcium binding and microtubule stabilization	1	345.5
sp|P68134|ACTS_MOUSE	Acta1	Actin, alpha skeletal muscle; Actins are highly conserved proteins that are involved in various types of cell motility and are ubiquitously expressed in all eukaryotic cells; Belongs to the actin family	1	772.7
sp|P70296|PEBP1_MOUSE	Pebp1	Phosphatidylethanolamine-binding protein 1; Binds ATP, opioids and phosphatidylethanolamine. Has lower affinity for phosphatidylinositol and phosphatidylcholine. Serine protease inhibitor which inhibits thrombin, neuropsin and chymotrypsin but not trypsin, tissue type plasminogen activator and elastase. Inhibits the kinase activity of RAF1 by inhibiting its activation and by dissociating the RAF1…	1	405.6
sp|P70349|HINT1_MOUSE	Hint1	Histidine triad nucleotide-binding protein 1; Hydrolyzes purine nucleotide phosphoramidates with a single phosphate group, including adenosine 5'monophosphoramidate (AMP-NH2), adenosine 5'monophosphomorpholidate (AMP-morpholidate) and guanosine 5'monophosphomorpholidate (GMP-morpholidate). Hydrolyzes lysyl-AMP (AMP-N-epsilon-(N-alpha-acetyl lysine methyl ester)) generated by lysine tRNA ligase, a…	1	265.4
sp|P70402|MYBPH_MOUSE	Mybph	Myosin-binding protein H; Binds to myosin; probably involved in interaction with thick myofilaments in the A-band	1.11	871.3
sp|P97457|MLRS_MOUSE	Mylpf	Myosin light chain, phosphorylatable, fast skeletal muscle	1	344
sp|Q02566|MYH6_MOUSE	Myh6	Myosin-6; Muscle contraction	1.62	1922.1
sp|Q3V1D3|AMPD1_MOUSE	Ampd1	AMP deaminase 1; AMP deaminase plays a critical role in energy metabolism	1	1537.7
sp|Q6P8J7|KCRS_MOUSE	Ckmt2	Creatine kinase S-type, mitochondrial; Reversibly catalyzes the transfer of phosphate between ATP and various phosphogens (e.g. creatine phosphate). Creatine kinase isoenzymes play a central role in energy transduction in tissues with large, fluctuating energy demands, such as skeletal muscle, heart, brain and spermatozoa (By similarity)	1	864.8
sp|Q9QYG0|NDRG2_MOUSE	Ndrg2	Protein NDRG2; Contributes to the regulation of the Wnt signaling pathway. Down-regulates CTNNB1-mediated transcriptional activation of target genes, such as CCND1, and may thereby act as tumor suppressor. May be involved in dendritic cell and neuron differentiation (By similarity); Belongs to the NDRG family	1	749.6
sp|Q9WUB3|PYGM_MOUSE	Pygm	Glycogen phosphorylase, muscle form; Phosphorylase is an important allosteric enzyme in carbohydrate metabolism. Enzymes from different sources differ in their regulatory mechanisms and in their natural substrates. However, all known phosphorylases share catalytic and structural properties	1	1712.6
tr|A2AQA9|A2AQA9_MOUSE	Neb	Nebulin	1.4	8629.6
tr|A8DUK4|A8DUK4_MOUSE	Hbb-bt	Hemoglobin subunit beta-1; Involved in oxygen transport from the lung to the various peripheral tissues	1	300.4
tr|E9PYJ9|E9PYJ9_MOUSE	Ldb3	LIM domain-binding protein 3; May function as an adapter in striated muscle to couple protein kinase C-mediated signaling via its LIM domains to the cytoskeleton	1.1	874.8
tr|E9Q8K5|E9Q8K5_MOUSE	Ttn	Titin; Key component in the assembly and functioning of vertebrate striated muscles. By providing connections at the level of individual microfilaments, it contributes to the fine balance of forces between the two halves of the sarcomere. The size and extensibility of the cross-links are the main determinants of sarcomere extensibility properties of muscle. In non-muscle cells, seems to play a ro…	1.01	60421.6
tr|F7CR78|F7CR78_MOUSE	Ttn	Titin; Key component in the assembly and functioning of vertebrate striated muscles. By providing connections at the level of individual microfilaments, it contributes to the fine balance of forces between the two halves of the sarcomere. The size and extensibility of the cross-links are the main determinants of sarcomere extensibility properties of muscle. In non-muscle cells, seems to play a ro…	1.11	11202.4
tr|Q545G5|Q545G5_MOUSE	Myl1	Myosin light chain 1/3, skeletal muscle isoform; Regulatory light chain of myosin. Does not bind calcium	0.96	287.7
tr|Q91VB8|Q91VB8_MOUSE	Hba-a2	Hemoglobin alpha, adult chain 2	1	287.3
